# Supplementary material for: Rhabdoviral Endogenous Sequences Identified in the Leishmaniasis Vector Lutzomyia longipalpis Are Widespread in Sandflies from South America
Source: MDPI journal article supplement (doi:10.3390/v16030395), 2024-03-02
Supplement: s1 [file s1]

>NcP1.1 (1413 bp)  
 CCCACGCCTCCTCATCAATAAAGCTCTAACGCACGAGGACGTGCGTCTCTTAAGGAAGGAGGTGTGGCGAA  
 ATCGCGGAATGCTCCCAATTCCTCAATCACCTTAACCGAAATTAGAACAACAATAAATGTACCTATA  
 AATAAGGCAAAAATATATATTTAAAATCAGTTTGGAGTTGAAAGTCAATAAGCGGAGTTTAAATCTCTACAC  
 TGATACCGATATTAACAAAATGATGAGAGTTGTTGCGTATGGTTTGAGTACTGACTCACTCCAGGTACGGGA  
 TGCAGTTCAATTTCTATACTTATTTCGGTTTGACAATCACGAGAGGTTGGAGAAACAGTTTATTGTTTCGGG  
 AAGCAGTGGTTGTCTGCCGGAACGTGTGTCTCCGAATATTCTCTTTAAGACAGTAAGGACAGATTACCTG  
 GCTGAGGAGGCAGAGCCGTACCTCCAATAACGTGACAGAATTGCCTGCCTTGGCTTTCCGAGTCTTTGT  
 GTTTAAAGACTGCACAAGTCAAAGAATCTCGGCTATAGACTCACACTTTGGAAAACAGCAAAGTCCATGTTG  
 AATGCACTTACTGAGGGAGCCTCATGGAGAGGCACTGGAACCCAGAACGATACAATACATGGGAGACATC  
TAACAATTTTACAAAGTTGGTGGCCGGATATGACTGGTCTTCCAGTTGTTTAAACAACATCAATATGCATCC  
TTGAGATTTCGGAACCGTTTCATCTCGAATGGCTGAGTGTACAGTCTTCAATGCATTGGAACACGTAATAGGA  
ACCCTGTCTGATGCCCCCTGCTCAGATTTACAAGTGGATTGGGGATCTACAGGTGATGAAGGAATACAACATT  
TTTGGTAAAGAGACAGACTTCTTCGAGAAATATGGGTCTGTTTACCCATACTTCGCGTGCCTCTGTCTTTTCA  
GAAAGTCCCATATGCTATAGGCCAAGTACCTCATCTCCATACGTATTGTCATACCATTAGTTGCTTAGCAGG  
GAGTCAATTCATAAGAACGCGACTTACTACCGGGGACCAACTTCAAAACATTAATTGGTTATGTATATTGT  
 ATTGTATGGATACATTGGTAACTATCCAAAAAGTGCTCTAAGTGATCGATACAAATCGATCGGAGATATTGT  
 GGAGTTCTGCAAAAAAGTGTGTAGTGTCTAAATTGTGCAAGTGCCACAAAACTCAGGCCAACTCCCCACT  
 GTGAGCGAATATCGCAGTGGGACTGTGAGTGAATATCACAGTGAATTATCCGGACCCACCGTGTGAATGAAT  
 ATCACACTTTGAAAAAGAAAAAATAGTTTGTAGAGAGCAGTGAAGTGAATCCCTAACTCTCATCTGTGAGTA  
 TAACCTTATCCAGTGCTTGGCCGCTCACCCAGCCATCCTG

>NcP1.2 (950 bp)  
 ATGCGGCTGCaACTTCTGGAGAGTTGGAGAGCTGGCGCTGGCACATCCTCACTTAACACTTCACATTTTCACT  
 CACTTTCTGTCCACCGACAGCAACCAAGTTCTTCTGGTACGTGTAGTAAATTAAACACCAGTTCTTGAGTT  
 CCCTCAGCAGTTACTTCAGCAACTTCTTCTTCTTCGCATATTTGTCAATCAAGTCTTTGACAGCGGCCTCATG  
 TCGGACCATTTCGAGCCCATCCTCCGTACGATCCAATGTAACATATCCCTGTCTATCTTGATGATGAGCTCTTTC  
 GCGACAAATCCGAAGCTCTTATAGTTCTGTGATCTAACAGGTCCCAAGTCTCGCTTATATCCATAATATGGGT  
 TATTGTTTCATGGTGTGTAACGCCTGTACGAGATTTCGAAAACTCTATTGGATAGAATGCCGCAATCTGATCCCA  
 ATCAAAATCTGAATATTCCACCATGGCTCTTCTGATAGTGCATATTGTTGTCAATCCAGAGAATGTAGiCTGG  
 TTCAGGATCGTCATCATCCTAATGCAGGTCCGGGGAAATGTAACCTTTCAGCTTGGTGA AAAACTCCTTGGCG  
 GTCTCATCTGTAATGTAAATACCGAAAGTATTGTAGAAAAATACGGATGACATCAACATTCAAGTTACAGGTG  
 ATTCCAATCTCTGATGAAAGTGCTGTATAGTTTGTTCAACTGTTAGACGAAATTGAACCCCTTGTGCCAT  
 AAGCTAGAATCATGTTTACTGCCGAATCGTTGCAGTAAAAAGTCACATTATATCCTTTCTCTGCATACCAGTC  
 TCTCATTTTGATGGCATGGTCAATCGTTGTGATCTCCTGAATATCGGGATGAGCTCTCTTGAAATCTCAAGGG  
 TAGTTCGTAAGTATCCAATACCTCATTGGTGTCTGACAAATTTTGTCCGGATGGCTCAAAGCCAGAGCCG  
 GT

>NcP2 (1307 bp)  
 AAAACAGTTTTTACAGGACAGAAAGTTTATGGCTCTTAGAACTTTTTTAATACATACAAAAATTTTTTCAAATG  
 TTTTACTTTCCGATCGCTGATGACGTCCTTATCGTATTAGGTGCTCAGCTGGGACCGGTCCAATTATCATTGT  
 ATACAACGCATATCTATAGTCCCAATCTTAGGGTATCAAGTATGGAGACATCGTGTATTATGCGACGCTT  
 AAGTTCATCATTCAATTCATATCCTCGTTTTATGTACCATATTAGTATTTTCATCTGGGTCTGTGTCCAGGGAA  
 CAGGTGTGGATAAATCTAGTTTGGAGGGTATAGATCCATCGCCTCCTTCATCACTCGTATTGTCACTGACCG  
 AATCCTGGCCATATCCATACACGCGACAAGTAAGTTCGTGCTTCAGAAAACCTACGTTCAACTCATCCTG  
 ATTTTCATCTACCTGTACTATCATACGTCCGGCCCCAAAACCGTTTGTCCAAGCATAAACACGCGAGGGTTGCG  
 TAGTCTATCAATTGTTTCAAATTGATATTGGGAGGGAGGATTGCATCTTTCGAAGTGTGCTGCGAGCCTGCCA  
AACACCCAATTATGTTAAACCAGGTGTGCAAAAGGGAACATTGCTCAATCCCCATGGAGATCTCCTTGACA  
TTCTGATGACATGCGAAGTATGGGAATATTGATCCTTTCTCATTAGGAAATCACTTTCTTTCGCCATGATTAC  
GTATTCATTATCATCTGCTCATCAAAATATCCATAGAGGAAGTTATAATACGGTATAAGAGCATTGCAGAT  
ATTTTTGAAGCTGTGGTAAACAGAGCACTCAGCCATCCGCGTTACGAAGCTTCCGAATCTGAACTGTGCCAA  
AGGGTGATCCGGGAAAAGAACAAAAACCAATCAAACCCAGCAACGATTTGGCAAAGTTATCATTGTTTCG  
GCCAGCCATTGTAGGAGTTTGGGGTTGCTGTACCTCTCCATTCTCCGTTGATCTCTAGCTGTCTCATATACGTT  
 TGAGCCCTACGTTGCAGAGAGGCTTTGTGGGTGTCATTTTGTCTTATGTACTCGATAGATGCATATAATCC  
 TGAAGGCGAGTGAAGCATTTTCGTTTCAAGAAGTGGTGGATTGGGATCCACATTATCAAAATACATAATCAT  
 TGAACCTCAATATTGAACGCGTAAGGGGGTCACTTTCTACCCCTTTTAAAGCCATGGTTTGCCAAAACAATT  
 AATGTCCTTCGACATTCCTTTTCATTTCGAGACCAAACATGTAGAGAAAGTGGACAGCTTCCTGGATT

Figure S-1: Extended nucleotide sequences of previously identified EVEs NcP1.1 and NcP2. The original sequences, initially identified in the exosomal fraction, are written and underlined in red. The EVE NcP1.2 identified *in silico* is also represented.
